1                   Prevalence of parasitic infections among recent immigrants to Chicago

2   Short title: Parasitic infections in Chicago

3

4   Jesica A. Herrick MD, MS<sup>1</sup>, Monica Nordstrom BS, MSPH<sup>2</sup>, Patrick Maloney BA, MPH<sup>2</sup>,  
5   Miguel Rodriguez BS, MPH<sup>2</sup>, Kevin Naceanceno BS<sup>3</sup>, Gloria Gallo Enamorado BS<sup>3</sup>,  
6   Rojelio Mejia MD<sup>3</sup>, Ron Hershow MD<sup>1, 2</sup>

7

8   <sup>1</sup> Department of Medicine, Division of Infectious Diseases, Immunology, and  
9   International Medicine, University of Illinois at Chicago, Chicago, IL, USA; <sup>2</sup> University of  
10   Illinois at Chicago School of Public Health, Chicago, IL, USA; <sup>3</sup> Department of  
11   Medicine, Section of Infectious Diseases, National School of Tropical Medicine,  
12   Baylor College of Medicine, Houston, TX, USA

13

14   Corresponding Author:  
15   Jesica A. Herrick, MD, MS  
16   Division of Infectious Diseases, Immunology, and International Medicine  
17   University of Illinois at Chicago  
18   808 South Wood, M/C 735  
19   Chicago, IL 60612  
20   [Christe5@uic.edu](mailto:Christe5@uic.edu)  
21   Tel: 312-996-3418  
22   Fax: 312-413-1421

23

24   Author contributions: Jesica A. Herrick was responsible for the funding acquisition,  
25   conceptualization of the study, study design and methodology, oversight of subject  
26   enrollment and regulatory aspects of the study, data curation and formal analysis, and  
27   writing of the manuscript. Monica Nordstrom, Patrick Maloney, and Miguel Rodriguez

28 were involved in the investigation and recruited and enrolled subjects in the study and  
29 provided a critical review of the manuscript. Patrick Maloney was also responsible for  
30 the formal statistical analyses. Kevin Naceanceno and Gloria Gallo Enamorado  
31 performed the Multi-parallel real-time quantitative PCR (qPCR) conducted on patient  
32 stool samples as part of the investigation. Rojelio Mejia oversaw the qPCR conducted  
33 on patient stool samples (supervisory role) and provided a critical review of the  
34 manuscript. Ron Hershow was involved in a supervisory capacity in the study concept  
35 and design, analysis and interpretation of data, and writing of the manuscript.

36

37 Related manuscripts: All authors certify that there is no related or duplicate manuscript  
38 under consideration for this work.

39

40 Attachments: STROBE statement

41 **ABSTRACT**

42 *Background.* Parasitic infections are likely under-recognized among immigrant  
43 populations in the United States (US). We conducted a cross-sectional study to  
44 evaluate the frequency of such infections among recent immigrants in Chicago and to  
45 identify predictive factors for parasitic infections.

46 *Methodology and principal findings.* 133 recent immigrants were enrolled, filling out a  
47 standardized questionnaire regarding medical history and exposures and providing  
48 blood and stool samples for evaluation. Fifteen of 125 subjects (12%) who provided a  
49 blood or stool sample for testing were found to have evidence of current or prior  
50 infection with a pathogenic parasite, of which *Toxocara* spp. (8 subjects, 6.4%) and  
51 *Strongyloides stercoralis* (5 subjects, 4%) were most commonly identified. Parasitic  
52 infection was more likely among subjects who had immigrated within the previous 2  
53 years and those with a self-reported history of ever having seen worms in the stool.  
54 Infected individuals were likely to have multiple nonspecific physical complaints;  
55 however, classic symptoms of parasitic infections (skin rashes, diarrhea, etc.) were not  
56 increased among infected individuals. The most useful surrogate markers identified for  
57 parasitic infections were an elevated Immunoglobulin E level (seen in 7/15 subjects with  
58 parasitic infections, 46.7% and 22/110 uninfected individuals, 20%,  $p=0.04$ ) and the  
59 presence of *Blastocystis hominis* cysts on Ova & Parasite exam (detected in 5/13  
60 subjects with parasitic infections who provided a stool sample, 38.5% and 5/98  
61 uninfected subjects, 5.1%,  $p=0.002$ ). In contrast, the Absolute Eosinophil Count  
62 (typically thought of as an indicator of parasites) was not found to be a good screening  
63 test for parasitic infections in this study.

64 *Conclusions.* Our study found that parasitic infections are common in recent US  
65 immigrants, which highlights an important health disparity among a vulnerable  
66 population. Further, we found that classically used symptoms and laboratory tests had  
67 a low predictive value for parasitic infections in this population.

68

69 **AUTHOR SUMMARY** – Parasitic infections, though rare in the United States (US), are  
70 common in many areas of the world including the regions of origin of many US  
71 immigrants. However, the prevalence rates and health impacts of these infections in  
72 immigrant populations are undefined. We conducted a study to identify the frequency of  
73 parasitic infections among healthy immigrants in one community, recruiting 133  
74 immigrants from 28 countries. Subjects completed a standardized questionnaire  
75 regarding symptoms and infection risk-factors and provided blood and stool samples for  
76 testing. Twelve percent of subjects in our study had evidence of current or previous  
77 pathogenic parasitic infections. Symptoms and risk factors classically thought to be  
78 associated with parasitic infection (allergic symptoms, elevated blood eosinophil counts,  
79 *etc.*) were common among enrolled subjects, but did not differ significantly between  
80 those with and without evidence for infection. Overall, our results suggest that many  
81 immigrants, even those who are asymptomatic, may have undiagnosed parasitic  
82 infections. These results highlight an important health disparity among a vulnerable  
83 underserved population in the US. As most of these infections are easily treatable,  
84 more research should be done to further characterize the optimal testing strategies for  
85 recent immigrants.

86

## 87 INTRODUCTION

88 In some regions and among select populations, parasitic diseases are believed  
89 to be a significant and under-recognized public health problem within the United States  
90 (US).[1-7] However, little is known about the current epidemiology of these  
91 infections.[3, 8] Although exact numbers are not available, studies have suggested that  
92 within the US there may be up to 300,000 people with Chagas disease,[9-15] 1.3 – 2.8  
93 million with serological evidence of exposure to *Toxocara* spp.,[3, 16] 4 million with soil-  
94 transmitted helminths,[3, 17, 18] 1.2 million with giardiasis,[19] 41,400 – 169,000 with  
95 cysticercosis,[3] and approximately 8,000 with schistosomiasis.[3] These infections  
96 represent an important health disparity in the US as higher infection rates for some  
97 parasites are believed to occur among those living in poverty in underserved rural and  
98 inner-city areas.[2, 3, 20-23]

99 Parasitic infections are believed to be an especially significant health problem  
100 within US immigrant populations. Many immigrants come from areas where some  
101 parasites are endemic.[3, 24-27] Additionally, recent immigrants may be more likely to  
102 have a decreased socioeconomic status and therefore frequently reside in the  
103 underserved areas within the US that have an increased prevalence of parasitic  
104 infections.[2-4, 22] This population thus possesses a dual risk for parasites.[7]  
105 However, published prevalence estimates vary widely and therefore the true prevalence  
106 and health impacts of parasitic infections on US immigrant populations is unknown.

107 Both diagnostic and methodologic limitations to research may explain the lack of  
108 information regarding parasitic infections among US immigrants. Diagnostic  
109 inaccuracies can occur because these infections frequently have nonspecific symptoms

110 or are asymptomatic, and laboratory tests for parasites can have significant limitations.  
111 For example, many of the current diagnostic tests for parasitic infections have poor  
112 sensitivity. Additionally, these tests are frequently unavailable in the community.[4, 6, 7,  
113 17, 25, 28, 29] Serologic testing, the primary method of diagnosis for many parasitic  
114 infections, has several important shortcomings, which contributes to the lack of accurate  
115 information regarding these infections. These limitations include: an inability to  
116 distinguish between active and past infections, the presence of significant cross-  
117 reactivity between serologic tests for different parasites, and the fact that some  
118 infections (such as many stool helminthiases) do not cause a detectable serologic  
119 response.[30-32]

120 Methodologic challenges to research studies may also partly account for the wide  
121 variations in reported prevalence estimates of parasitic infections.[1, 3, 4] For example,  
122 past estimates of Chagas disease prevalence were based on testing of blood-donors.  
123 This method likely underestimated the number of infected individuals due to a “healthy-  
124 donor” effect and due to the removal of those with previous positive tests from the pool  
125 of potential blood donors.[33] A second commonly used method to obtain prevalence  
126 estimates involves multiplying the proportion of people infected with a specific disease  
127 within a country by the number of immigrants from that country living in the US.  
128 However, within endemic countries there can be large differences in infection risk  
129 across different populations and infection risks among those who emigrated may be  
130 different from that of the general population within a given country.[10, 11, 24, 34-36]

131 Given the limited data regarding the prevalence of parasitic infections, it is  
132 unsurprising that the health impacts imposed by parasites on US immigrant populations

133 are poorly understood. Many of the published studies evaluating health impacts of  
134 parasitic infections on immigrants either screened for only a small number of parasites  
135 or screened immigrants from a single country, and many were retrospective.[9, 11, 13,  
136 14, 25, 26, 37, 38] Improved data regarding the prevalence and impact of these  
137 infections are badly needed as parasitic infections can have serious health  
138 consequences.[2, 3, 5-7, 17, 20, 39] For example, Chagas disease causes  
139 cardiomyopathy and/or esophageal or colonic dilation in up to 20-30% of those  
140 infected;[9, 40] those with Toxocariasis may have an increased risk for asthma;[41-44]  
141 and intestinal parasite infection has been associated with delayed cognitive  
142 development and impaired nutrition in some studies.[45, 46] Parasitic infections have  
143 also been shown to increase the severity of illnesses due to other infectious diseases  
144 (such as tuberculosis and HIV).[1]

145 Most studies evaluating the impact of parasitic infections in the US have focused  
146 on the Southern states because of a warmer climate (facilitating the acquisition of soil-  
147 transmitted helminths) and a comparatively high population of immigrants.[5, 12, 13, 22,  
148 47] According to US Census reports, however, Illinois is among the states with the  
149 highest percentages of immigrants; 10-15% of the state's population is foreign born.[48]  
150 Thus, this study was conducted with the overall aim of evaluating the prevalence of  
151 parasitic infections among recent immigrants living in Chicago. As many of the  
152 symptoms of parasitic infections are nonspecific, an additional objective of our study  
153 was to identify any symptoms, signs, or laboratory tests that could be used in this  
154 population as predictors of the presence of parasites.

155

156 **METHODS**

157 **Ethics statement.** The study was approved by the Institutional Review Board of the  
158 University of Illinois at Chicago and written informed consent was obtained from all  
159 participants. Adult subjects signed a consent form, and for enrolled individuals between  
160 the ages of 10 and 18, the subject signed an assent form and a parent or guardian  
161 signed a parental permission form. For all study activities, study procedures were  
162 explained to the participant in their stated language of preference (using an interpreter if  
163 needed). Each participant received \$40 to compensate them for their time. Treatment  
164 for parasitic infections was not a part of the study, but all subjects were notified of their  
165 results and those with positive tests were offered the possibility of seeing one of the  
166 study authors (JH) in clinic to discuss treatment options.

167

168 **Study design.** Patients were enrolled for this cross-sectional study between November  
169 2014 and July 2016. Subjects were recruited through collaboration with local  
170 organizations that provide services to immigrants as well as at English as a Second  
171 Language classes, the Mexican consulate in Chicago, through a mass email sent to  
172 students enrolled at the University of Illinois at Chicago, and at community health fairs.  
173 Subjects were also recruited from community health clinics as long as they were  
174 accessing the health care system for reasons clearly unrelated to a parasitic infection  
175 (e.g., patients presenting for routine physical exams). Subjects were eligible for  
176 inclusion if they were: ages 10-80; willing to undergo a blood draw and provide a stool  
177 sample; and an immigrant living in the US mainland for less than 5 years and were  
178 originally from Africa, Asia, South America, Central America, Mexico, the Caribbean



179 islands, or Puerto Rico. Although they are U.S. citizens and not immigrants from non-  
180 US territories, Puerto Ricans were specifically included in this study because previous  
181 research suggested that parasitic infections were common among the Puerto Rican  
182 population in Chicago.[49] The five-year time point for living in the US was chosen  
183 because immigrants have been shown to have the highest risk for parasitosis in the first  
184 5 years after emigration[49] and based on the average expected lifespan of hookworms,  
185 *Ascaris lumbricoides* and *Trichuris trichiura*, a primary focus of our investigations.[50]  
186 Subjects were excluded from the study if they: 1) were currently pregnant, as the  
187 immunosuppression of pregnancy may cause a different presentation of parasitic  
188 infection and one of the aims of the study was to identify factors predictive of  
189 parasitosis; or 2) they had taken antiparasitic medications since moving to the  
190 continental US.

191 Upon enrollment, a standardized questionnaire (Supplemental Appendix) was  
192 administered to collect information regarding demographics, risk factors for parasitic  
193 infections, and symptoms. Participants then provided clinical samples (blood and stool)  
194 to be tested for evidence of parasitic infections as described below.

195

196 **Laboratory testing.** Whole blood for a Complete Blood Count was collected in an  
197 Ethylenediaminetetraacetic acid (EDTA) tube and processed in the clinical laboratory at  
198 the University of Illinois at Chicago (BXH 800 or BXH 1600, Beckman Coulter, Brea,  
199 CA) within 12 hours. Serum samples were collected in a serum separator tube (SST)  
200 and centrifuged within 1 hour of collection. A portion of the supernatant was sent for  
201 measurement of Immunoglobulin E (IgE) level (Quantitative ImmunoCAP® Fluorescent

202 Enzyme Immunoassay, Arup Laboratories, Salt Lake City, UT). The remainder of the  
203 supernatant was stored at -80 °C until samples were shipped as a batch to the Centers  
204 for Disease Control and Prevention, where serologic testing was performed for  
205 infections endemic to each subject's country of origin (Supplemental Table 1).

206 Antibody responses to cysticercosis, strongyloidiasis, and toxocariasis were  
207 determined using a multiplex bead-based assay (MBA).[51-53] For cysticercosis, 3  
208 recombinant antigens (rGP50, rT24H, and sTs18var1) were used; one recombinant  
209 antigen was used for both strongyloidiasis (Ss-NIE-1) and toxocariasis (rTc-CTL-1).  
210 Briefly, the antigens were coupled to carboxylated magnetic particles, and then  
211 incubated with sera (diluted 1:100 in PBS/0.3% Tween-20/5% milk) for 30 minutes. After  
212 two washes with PBS/0.3% Tween-20, the complex was detected by a biotinylated  
213 conjugate which then reacted with streptavidin-phycoerythrin. The mean fluorescence  
214 intensity was measured using the MagPix instrument (Luminex corporation, Austin, TX).  
215 Positivity for each antibody response was determined using specific cut-off points for  
216 each antigen (which had been previously defined[51-53]).

217 Antibody against *T. cruzi* antigens was detected using a commercial kit (Weiner  
218 Lab, Argentina) and following the company protocol instructions.[54-56] After adding  
219 serum, the plate was incubated for 30 min while shaking at room temperature. After the  
220 conjugate was added, the reaction ran for an additional 30 minutes. Substrate (TMB)  
221 was added and color development was stopped by adding 1N H<sub>2</sub>SO<sub>4</sub> according to the  
222 kit instructions[55]. The optical density at 450nm was detected using the Versamax  
223 system.

224 All serum specimens were initially tested by FAST-ELISA using *Schistosoma*  
225 *mansoni* adult microsomal antigen and then by a species-specific immunoblot  
226 appropriate to the subject's country of origin. These procedures and the methods used  
227 to interpret results have been discussed in previous publications.[57-59]

228 Patients also provided a stool sample for standard Ova & Parasite (O&P) direct  
229 microscopy (Arup Labs Qualitative Concentration/Trichrome Stain/Microscopy, Salt  
230 Lake City, UT), and a multi-parallel quantitative polymerase chain reaction (qPCR)  
231 which tests for eight common gastrointestinal pathogens (*Ancylostoma*, *Ascaris*,  
232 *Cryptosporidium*, *Entamoeba*, *Giardia*, *Necator*, *Strongyloides*, and *Trichuris*). Only one  
233 stool sample was requested for O&P due to our desire to compare O&P directly with  
234 qPCR and because the yield of collecting multiple samples for O&P exam has been  
235 shown to be low in immigrant populations.[60] The stool samples for qPCR were frozen  
236 without fixatives at -80 °C and shipped as a batch to the Baylor College of Medicine  
237 where DNA was extracted and the qPCR was conducted according to previously  
238 published methods.[61-63]

239  
240 **Statistical analysis.** Statistical analyses were performed using Prism 7 (GraphPad,  
241 San Francisco, CA) and SAS (Cary, NC). Data were summarized by using frequency  
242 with percentage for categorical variables. For continuous variables, geometric mean  
243 with standard deviation or median with range or interquartile range were used (medians  
244 were used as measures of central tendency for highly skewed variables). For  
245 categorical variables, prevalence ratios (PR) were used to evaluate relationships  
246 between covariates and the main outcome (the presence of a parasitic infection) and

247 Fisher's Exact test or Chi-squared test were used to determine significance. Mann-  
248 Whitney U test was used to evaluate for associations between continuous variables and  
249 the presence of a parasite. Correlations were calculated using Spearman's rank  
250 correlation coefficient. Kappa values were used to compare results from stool O&P  
251 exam to qPCR testing.

252

## 253 **RESULTS**

254 **Patient characteristics.** Seven hundred and thirty-eight people were approached  
255 about the study, and 133 were enrolled (Supplemental Figure 1). All enrolled subjects  
256 filled out the study questionnaire (unedited results shown in Supplemental Table 2); 125  
257 (94%) of enrolled subjects provided blood and 113 (85%) provided stool samples to be  
258 tested for parasitic infections (however, for 2 of the 113 subjects, only qPCR could be  
259 performed as they did not return samples for O&P exam). The mean age of enrolled  
260 subjects was 32 years, and 60/133 (45.1%) were male (Table 1). Participants came  
261 from 28 different countries. Most subjects (95/133, 71.4%) reported an annual  
262 household income of less than \$20,000 per year. As shown in Table 1, few subjects  
263 (25/133, 18.8%) had been raised in a rural environment. Despite this, many subjects  
264 reported having been exposed to animals (65/133, 48.9%), well-water (65/133, 48.9%),  
265 and bathing in ponds or streams (58/133, 43.6%) in their country of origin.

266

267 Table 1. Demographics, symptoms, and laboratory results of 133 enrolled subjects

| Characteristic                       | Results <sup>a</sup> |
|--------------------------------------|----------------------|
| Age, mean years (standard deviation) | 32 (17.3)            |

|                                                                                                                          |                             |
|--------------------------------------------------------------------------------------------------------------------------|-----------------------------|
| Gender, male:female, N (% male)                                                                                          | 60:73 (45.1)                |
| Country/region of origin, N (%)                                                                                          |                             |
| Asia (excluding India)                                                                                                   | 33 (24.8)                   |
| Mexico                                                                                                                   | 30 (22.6)                   |
| India                                                                                                                    | 26 (19.5)                   |
| Central/South America                                                                                                    | 22 (16.5)                   |
| Africa                                                                                                                   | 13 (9.8)                    |
| Middle East                                                                                                              | 5 (3.8)                     |
| US (Puerto Rico)                                                                                                         | 4 (3)                       |
| Mean number of years in school (standard deviation)                                                                      | 9.9 (5.2)                   |
| Annual household income in US dollars, N (%)                                                                             |                             |
| < 20,000                                                                                                                 | 95 (71.4)                   |
| 20,000 - 40,000                                                                                                          | 30 (22.6)                   |
| 40,000 - 60,000                                                                                                          | 5 (3.8)                     |
| 60,000 - 100,000                                                                                                         | 2 (1.5)                     |
| > 100,000                                                                                                                | 1 (0.8)                     |
| Length of time living in the continental United States <sup>b</sup> , mean years<br>(range, standard deviation in years) | 2 (10 days–5<br>years, 1.6) |
| Raised in rural environment, N (%)                                                                                       | 25 (18.8)                   |
| Exposure history prior to immigration, number yes (%)                                                                    |                             |
| Frequently walked barefoot                                                                                               | 76 (57.1)                   |

|                                                                                      |                            |
|--------------------------------------------------------------------------------------|----------------------------|
| Close contact with animals                                                           | 65 (48.9)                  |
| Used a well as source of drinking water                                              | 65 (48.9)                  |
| Bathed in streams or ponds                                                           | 58 (43.6)                  |
| Lived in a house with a thatched roof                                                | 25 (18.8)                  |
| Treatment with antiparasitic medication prior to emigration, number yes (%)          | 46 (34.6)                  |
| Symptoms reported by the patient on the day of study enrollment <sup>c</sup> , N (%) |                            |
| Gastrointestinal                                                                     | 32 (24.1)                  |
| Constitutional                                                                       | 25 (18.8)                  |
| Musculoskeletal                                                                      | 25 (18.8)                  |
| Dermatologic                                                                         | 13 (9.8)                   |
| Pulmonary                                                                            | 12 (9)                     |
| Cardiovascular                                                                       | 10 (7.5)                   |
| Allergic                                                                             | 3 (2.3)                    |
| Immunoglobulin E (IgE) results                                                       |                            |
| Subjects with elevated Immunoglobulin E, N (%)                                       | 29/125 <sup>d</sup> (23.2) |
| Immunoglobulin E level, IU/mL, median (range, standard deviation)                    | 57 (3-7732, 706)           |
| Absolute eosinophil count (AEC) results                                              |                            |

|                                                                                   |                           |
|-----------------------------------------------------------------------------------|---------------------------|
| Subjects with elevated absolute eosinophil count, N (%)                           | 12/123 <sup>e</sup> (9.8) |
| Absolute eosinophil count, median cells/microliter<br>(range, standard deviation) | 200 (0-1600,<br>240)      |
| Pathogenic parasitic infection, N (%)                                             | 15/125 <sup>f</sup> (12)  |

268 a - unedited results from all enrolled subjects are shown in Supplemental Table 2; N –  
269 number of subjects; b - potential range (due to enrollment criteria) 0-5 years; c –  
270 gastrointestinal symptoms included: heartburn, difficulty or pain with swallowing,  
271 abdominal pain, diarrhea, nausea/vomiting; constitutional symptoms included: weight  
272 loss, fatigue, fevers, and weakness; musculoskeletal symptoms included pain and  
273 stiffness in the joints or myalgias; dermatologic: itching, hives, or rash; pulmonary  
274 symptoms: wheezing, shortness of breath, cough; cardiovascular: chest pain,  
275 palpitations, or irregular heart beat; and allergic symptoms included: those who  
276 responded “yes” to the question “do you currently have any symptoms of seasonal  
277 allergies;” d – of the 125 subjects who underwent a blood draw, normal value of IgE  
278 defined as <696 IU/mL for subjects 10-12 years old, <629 for those ages 13-15, < 537  
279 for those ages 16-17, and < 214 IU/mL in adults; e – for two of the 125 subjects who  
280 underwent a blood draw, a complete blood count was unable to be performed due to  
281 clotting of the blood sample, normal AEC defined as < 500 cells/UL; f – of 125 subjects  
282 who provided a clinical sample (blood or stool) for testing

283

284 **Laboratory testing.** The median IgE among the 125 subjects from whom blood  
285 samples were obtained was 57 IU/mL (range 3-7732); 29 (23.2%) subjects had elevated  
286 IgE levels. Twelve subjects (9.8%) were found to have eosinophilia, and the median

287 absolute eosinophil count (AEC) level was 200 cells/UL (range 0-1600 cells/UL, Table  
288 1). There was a weak correlation between IgE and AEC levels in adults ( $r=0.23$ ,  
289  $p=0.02$ ; children were excluded from this correlation as they have different normal  
290 ranges for IgE).

291  
292 **Parasitic infections.** Fifteen of 125 subjects (12%) who provided a clinical sample for  
293 testing were found to have evidence of current or prior infection with a pathogenic  
294 parasite species. As shown in Table 2, the most common infections identified were  
295 *Toxocara* spp., seen in 8 subjects (6.4%), followed by *Strongyloides stercoralis* (5  
296 subjects, 4%). Of subjects found to have evidence of parasitic infection, 3 subjects  
297 (3/15, 20%) had positive tests for more than one pathogenic parasitic species (Table 2).

298  
299 Table 2. Parasitic infections diagnosed among recent immigrants living in Chicago

| Parasitic infections                                                | Number of subjects infected (%) |
|---------------------------------------------------------------------|---------------------------------|
| <b>Soil-transmitted helminths</b>                                   |                                 |
| <i>Toxocara</i> spp.                                                | 8 (6.4) <sup>a</sup>            |
| <i>Strongyloides stercoralis</i>                                    | 5 (4) <sup>b</sup>              |
| <i>Trichuris trichiura</i>                                          | 2 (1.8) <sup>c</sup>            |
| <i>Ascaris lumbricoides</i>                                         | 1 (0.9) <sup>c</sup>            |
| <b>Protozoa</b>                                                     |                                 |
| <i>Giardia duodenalis</i>                                           | 4 (3.5) <sup>d</sup>            |
| <b>Non-pathogenic or disputed pathogenicity species<sup>e</sup></b> |                                 |
| <i>Blastocystis hominis</i>                                         | 10 (9)                          |
| <i>Endolimax nana</i>                                               | 4 (3.6)                         |
| <i>Dientomoeba fragilis</i>                                         | 3 (2.7)                         |



|                                                                                       |                      |                      |
|---------------------------------------------------------------------------------------|----------------------|----------------------|
| <i>Iodamoeba bütschlii</i> , <i>Entamoeba coli</i> ,<br><i>Entamoeba hartmanii</i>    | 1 each (0.9)         |                      |
| Number of subjects with multiple pathogens                                            | 3 (2.4) <sup>f</sup> |                      |
| <b>Comparison of Ova and Parasite Exam to qPCR for pathogenic species<sup>g</sup></b> | <b>qPCR positive</b> | <b>qPCR negative</b> |
| <b>Ova &amp; Parasite positive</b>                                                    | 1                    | 0                    |
| <b>Ova &amp; Parasite negative</b>                                                    | 7                    | 107                  |

300 N – number of subjects; a – of 125 subjects who provided blood samples for testing, all  
301 eight subjects were diagnosed based on a positive serologic test; b – of 125 subjects  
302 who provided blood and/or stool samples for testing: one subject tested negative on O&P  
303 but positive on both serology and stool qPCR, three subjects had a positive serologic test  
304 but negative O&P and qPCR, and one subject had a positive serology but did not provide  
305 a stool sample for testing; c – of 113 subjects who provided a stool sample for qPCR  
306 testing, pathogenic species diagnosed based on a positive stool qPCR test; d – of 113  
307 subjects who provided a stool sample for testing: one subject tested positive on both  
308 qPCR and O&P tests and three subjects tested positive on qPCR but negative on O&P; e  
309 – of 111 subjects who returned a stool sample for O&P testing, all infections diagnosed  
310 based on a positive on O&P exam as these nonpathogenic or disputed pathogenicity  
311 organisms were not tested for on qPCR; f - of 125 subjects who provided blood and/or  
312 stool samples for testing: one subject had positive stool qPCR tests for both *Ascaris* and  
313 *Trichuris* and a positive serologic test for *Toxocara*, one subject had positive stool qPCR  
314 tests for *Trichuris* and *Giardia* as well as positive serologic testing for *Toxocara*, and the

315 third subject had positive serologic testing and stool qPCR for *S. stercoralis* and positive  
316 serologic testing for *Toxocara*; g - p-value=0.07, sensitivity of O&P compared to qPCR  
317 12.5%, specificity 100%, positive predictive value (PPV) 100%, negative predictive value  
318 (NPV) 93.9%, kappa 0.21.

319

320 **Outcome assessment.** With the exception of constitutional symptoms, which were  
321 slightly more likely to be present in subjects diagnosed with *Giardia* (p=0.01), there were  
322 no significant differences in any of the evaluated symptoms, exposures, or laboratory  
323 results between those found to be mono-infected with each of the different parasite  
324 species detected (e.g. *Toxocara* spp., soil-transmitted helminths, or *Giardia*).  
325 Consequently, for our primary analysis we compared uninfected individuals to subjects  
326 with evidence for any pathogenic parasitic infection, with infected subjects treated as a  
327 single group.

328 A large number of subjects (10/111 subjects who provided a sample for O&P  
329 testing, 9%) were found to have *Blastocystis hominis*. Although the pathogenicity of *B.*  
330 *hominis* remains controversial,[64, 65] infection with this organism in our sample was  
331 not associated with any significant differences in symptoms or laboratory values  
332 compared to the uninfected group. Accordingly, in our analysis *Blastocystis* was not  
333 included as a pathogenic parasitic infection.

334

335 **Demographic characteristics of subjects with parasitic infections.** Nearly all  
336 of the subjects found to have evidence of a pathogenic parasite (14/15, 93.3%) had  
337 lived in the continental US for 2 years or less (compared to 70/110 of those who were

338 uninfected, 63.6%, PR 6.8, p=0.02, Table 3). This history was therefore a very  
 339 sensitive, though not specific, marker for parasitic infections (sensitivity 93.3%,  
 340 specificity 36.4%, PPV 16.7%, NPV 97.6%). No other demographic variables, including  
 341 age, gender, recruitment site, or region of origin differed significantly between those with  
 342 and without infections. As shown in Table 3, there was a trend (though not statistically  
 343 significant) towards a greater likelihood of parasitic infections in subjects of Asian origin,  
 344 subjects who had not completed high school, and subjects with an annual household  
 345 income of less than \$20,000 per year.

346

347 Table 3. Findings associated with the presence of a parasitic infection

| Demographics                                                 | Uninfected<br>N=110 | Parasitic<br>Infection <sup>a</sup><br>N=15 | Prevalence<br>ratio <sup>b</sup><br>(95%<br>Confidence<br>Interval) | p-<br>value |
|--------------------------------------------------------------|---------------------|---------------------------------------------|---------------------------------------------------------------------|-------------|
| <b>Length of time living in the<br/>United States, N (%)</b> |                     |                                             |                                                                     |             |
| > 2 years                                                    | 40 (36.4)           | 1 (6.7)                                     | Reference                                                           | <b>0.02</b> |
| ≤ 2 years                                                    | 70 (63.6)           | 14 (93.3)                                   | 6.8 (0.9-50.2)                                                      |             |
| <b>Mean age (standard<br/>deviation)</b>                     | 31 (16.4)           | 37.5 (21.6)                                 | 1.0 (1.0-1.1)                                                       | 0.2         |
| <b>Gender, N (%)</b>                                         |                     |                                             |                                                                     |             |

|                                            |                        |           |                |      |
|--------------------------------------------|------------------------|-----------|----------------|------|
| Female                                     | 58 (52.7)              | 8 (53.3)  | Reference      | 0.99 |
| Male                                       | 52 (47.3)              | 7 (46.7)  | 1.0 (0.4-2.5)  |      |
| <b>Country/Region of origin, N (%)</b>     |                        |           |                |      |
| Mexico                                     | 26 (23.6)              | 2 (13.3)  | Reference      | 0.28 |
| Asia (excluding India)                     | 24 (21.8)              | 8 (53.3)  | 3.5 (0.8-15.1) |      |
| India                                      | 21 (19.1)              | 2 (13.3)  | 1.2 (0.2-8)    |      |
| Central/South America                      | 18 (16.4)              | 2 (13.3)  | 1.4 (0.2-9.1)  |      |
| Africa                                     | 12 (10.9)              | 1 (6.7)   | 1.1 (0.1-10.8) |      |
| Middle East                                | 5 (4.5)                | 0 (0)     | Undefined      |      |
| USA (Puerto Rico)                          | 4 (3.6)                | 0 (0)     | Undefined      |      |
| <b>Years of schooling</b>                  |                        |           |                |      |
| >12                                        | 56 (51.9) <sup>c</sup> | 5 (33.3)  | Reference      | 0.27 |
| 9-12                                       | 28 (25.9)              | 4 (26.7)  | 1.5 (0.4-5.7)  |      |
| ≤8                                         | 24 (22.2)              | 6 (40)    | 2.4 (0.7-7.9)  |      |
| <b>Annual household income, US dollars</b> |                        |           |                |      |
| ≥20,000                                    | 34 (30.9)              | 2 (13.3)  | Reference      | 0.2  |
| <20,000                                    | 76 (69.1)              | 13 (86.7) | 2.6 (0.6-11.1) |      |

| Childhood Exposures (in country of origin)                                   | Uninfected, number yes, (%)<br>N=110 | Parasitic infection, number yes, (%)<br>N=15 | Prevalence ratio <sup>b</sup> (95% confidence interval) | p-value      |
|------------------------------------------------------------------------------|--------------------------------------|----------------------------------------------|---------------------------------------------------------|--------------|
| Self-reported history of seeing worms in the stool                           | 18 (16.4)                            | 8 (53.3)                                     | 4.4 (1.7-10.9)                                          | <b>0.003</b> |
| Used a well as source of drinking water                                      | 49 (44.5)                            | 11 (73.3)                                    | 3.0 (1.0-8.9)                                           | 0.05         |
| Raised in rural environment                                                  | 19 (17.3)                            | 3 (20)                                       | 1.2 (0.4-3.8)                                           | 0.73         |
| Frequently walked barefoot                                                   | 60 (54.5)                            | 11 (73.3)                                    | 2.1 (0.7-6.2)                                           | 0.27         |
| Close contact with animals                                                   | 51 (46.4)                            | 7 (46.7)                                     | 1.0 (0.4-2.6)                                           | 0.99         |
| Bathed in streams or ponds                                                   | 47 (42.7)                            | 7 (46.7)                                     | 1.2 (0.4-3.0)                                           | 0.79         |
| Lived in a house with a thatched roof                                        | 20 (18.2)                            | 3 (20)                                       | 1.1 (0.3-3.6)                                           | 0.99         |
| Treated with antiparasitic medication (prior to emigration)                  | 38 (34.5)                            | 7 (46.7)                                     | 1.6 (0.6-4.0)                                           | 0.4          |
| Symptoms reported by the patient on the day of study enrollment <sup>d</sup> | Uninfected, number yes, (%)<br>N=110 | Parasitic infection, number yes, (%)         | Prevalence ratio <sup>b</sup> (95% confidence interval) | p-value      |

|                  |           | N=15     |               |             |
|------------------|-----------|----------|---------------|-------------|
| Gastrointestinal | 26 (23.6) | 3 (20)   | 0.8 (0.3-2.7) | 0.99        |
| Constitutional   | 17 (15.5) | 6 (40)   | 3 (1.2-7.5)   | <b>0.03</b> |
| Musculoskeletal  | 18 (16.4) | 6 (40)   | 2.8 (1.1-7.1) | <b>0.04</b> |
| Dermatologic     | 11 (10)   | 1 (6.7)  | 0.7 (0.1-4.7) | 0.99        |
| Pulmonary        | 10 (9.1)  | 1 (6.7)  | 0.7 (0.1-5.1) | 0.99        |
| Cardiovascular   | 7 (6.4)   | 2 (13.3) | 2 (0.5-7.5)   | 0.29        |
| Allergic         | 2 (1.8)   | 0 (0)    | Undefined     | 0.99        |

348  
349 N – number of subjects; a – Not including non-pathogenic or disputed pathogenicity  
350 organisms; b – prevalence ratio comparing the frequency of the listed demographic  
351 variable, symptom, or exposure in those with versus those without evidence of a  
352 parasitic infection; c – 108 of the 110 subjects without parasitic infections responded to  
353 this question; d - gastrointestinal symptoms included: heartburn, difficulty or pain with  
354 swallowing, abdominal pain, diarrhea, nausea/vomiting; constitutional symptoms  
355 included: weight loss, fatigue, fevers, and weakness; musculoskeletal symptoms  
356 included pain and stiffness in the joints or myalgias; dermatologic: itching, hives, or  
357 rash; pulmonary symptoms: wheezing, shortness of breath, cough; cardiovascular:  
358 chest pain, palpitations, or irregular heart beat; and allergic symptoms included: those  
359 who responded “yes” to the question “do you currently have any symptoms of seasonal  
360 allergies.”

361  
362 **Exposure history and symptoms in subjects with evidence of parasitic infection.**

363 A self-reported history of ever having seen worms in the stool was strongly associated  
364 with evidence of current or prior parasitic infection (8/15, 53.3% in the infected group

365 reported this history versus 18/110, 16.4%, in the uninfected group,  $p=0.003$ , PR 4.4,  
366 Table 3). This history appeared to be a nonspecific marker of risk for any parasitic  
367 infection and was equally common among those diagnosed with enteric parasites  
368 compared to those with non-enteric parasites ( $p$ -value=0.8). Although it did not reach  
369 significance, there also appeared to be a trend towards increased parasitic infections in  
370 subjects who recalled drinking well water in their country of origin (11/15, 73.3%)  
371 compared to those who did not (49/110, 44.5%,  $p=0.05$ , PR 3). Other classic risk  
372 factors for parasitic infections (close contact with animals, *etc.*), although commonly  
373 reported among study participants, did not differ between those with and without  
374 evidence of parasitic infections (all  $p$ -values  $\geq 0.05$ , Table 3).

375 In the year prior to study enrollment, subjects with evidence of parasitic infections  
376 had experienced an overall increased number of physical complaints (median 8)  
377 compared to those with no evidence of parasites (4,  $p=0.02$ ). However, symptoms  
378 typically thought of as indicative of parasitic infections, such as rash, pruritus, or  
379 diarrhea, did not differ significantly between the groups (all  $p$ -values  $>0.05$  for symptoms  
380 experienced both the day of study enrollment and within the previous year).

381  
382 **Laboratory values in subjects with evidence of parasitic infections.** Both the  
383 median IgE level (249 IU/mL) and the proportion of subjects with an increased IgE level  
384 (7 of 15 subjects, 46.7%) were significantly increased in subjects with evidence for  
385 parasitic infections compared to those who were uninfected (median IgE 52 IU/mL,  
386 22/110, 20%, subjects with elevated IgE level, both  $p$ -values  $<0.05$ , Table 4). In  
387 contrast, subjects who reported a history of seasonal allergies and/or asthma were not

388 found to have increases in IgE (p-value=NS). The difference in median IgE levels  
 389 between groups remained statistically significant when subjects <18 years old were  
 390 excluded from analysis (as normal values for IgE are higher in this group). Although an  
 391 elevated IgE level was a relatively specific finding for parasitic infections (specificity  
 392 80%, NPV 92%), this finding was not a sensitive marker of infection (sensitivity 47%,  
 393 PPV 24%).

394

395 Table 4. Laboratory results in uninfected versus infected individuals

| Laboratory results                                         | Uninfected<br>N=110 | Parasitic<br>infection <sup>a</sup><br>N=15 | p-value                                |
|------------------------------------------------------------|---------------------|---------------------------------------------|----------------------------------------|
| Immunoglobulin E (IgE), Median<br>(IQR), IU/mL             | 52 (26 - 177)       | 249 (67 - 480)                              | <b>0.005</b>                           |
| Infected with 1 parasite                                   |                     | 111 (50.5–311)                              |                                        |
| 2+ parasitic infections                                    |                     | 662 (267–1097)                              |                                        |
| Absolute Eosinophil Count<br>(AEC), Median (IQR), cells/UL | 200 (100 - 200)     | 200 (100 - 400)                             | 0.1                                    |
| Hemoglobin, mg/dL, mean<br>(standard error)                | 14.4 (0.2)          | 14.1 (0.3)                                  | 0.6                                    |
| Number of subjects with<br>abnormal laboratory test        | Uninfected,         | Parasitic                                   | Prevalence<br>ratio (95%<br>confidence |



|                                                       | N (%)                 | infection, N (%)       | interval), p-value              |
|-------------------------------------------------------|-----------------------|------------------------|---------------------------------|
| IgE, Number elevated <sup>b</sup> (%)                 | 22 (20)               | 7 (46.7)               | 3.5 (1.4-8.8),<br><b>0.04</b>   |
| AEC, Number elevated <sup>c</sup> (%)                 | 9 (8.3) <sup>d</sup>  | 3 (20)                 | 2.4 (0.8-7.2),<br>0.2           |
| <i>Blastocystis hominis</i> cysts present on O&P exam | 5 (5.1 <sup>e</sup> ) | 5 (38.5 <sup>f</sup> ) | 6.3 (2.5-15.7),<br><b>0.002</b> |

396 N – number; a – excluding non-pathogenic or disputed pathogenicity species; IQR –  
397 interquartile range; b - normal value of IgE <696 IU/mL for subjects 10-12 years old,  
398 <629 for those ages 13-15, < 537 for those ages 16-17, and < 214 IU/mL in adults; c -  
399 normal AEC < 500 cells/UL; d – of 108 subjects in the uninfected group who were tested  
400 for a CBC (as for two patients who underwent a blood draw the CBC was unable to be  
401 performed due to clotting of blood in the tube); e - of 98 subjects in the uninfected group  
402 who provided a stool sample for O&P exam; f – of 13 subjects in this group who  
403 provided a stool sample for O&P exam.

404

405 The median AEC did not differ between those with and without evidence of a  
406 parasitic infection (Table 4). Eosinophilia in our sample was also not associated with a  
407 reported history of allergies, asthma, or taking medications known to cause  
408 eosinophilia.[66, 67] Despite a low sensitivity for parasites (20%, PPV 25%), however,  
409 eosinophilia was relatively specific to subjects with evidence of parasitic infection

410 (specificity 91.8%, NPV 89.4%). The sensitivity of AEC as a marker for parasitic  
411 infection did not improve appreciably when only parasitic infections known to cause  
412 chronic eosinophilia (*Strongyloides* and *Toxocara*[28, 67-69]) were compared to those  
413 who were uninfected.

414 The presence of cysts of *B. hominis* on O&P exam was strongly associated with  
415 infection with a pathogenic parasite species. Five of the 13 subjects in the parasite  
416 positive group who returned a stool sample had a positive O&P for *Blastocystis*, 38.5%,  
417 compared to 5/98 tested for O&P exam in the uninfected group, 5.1%,  $p=0.002$ ,  
418 PR=6.3.

419

## 420 **DISCUSSION**

421 Despite the fact that many US immigrants come from areas where parasitic  
422 infections are endemic, data about the prevalence and risks for parasites among  
423 immigrants are sparse. In response to this deficit, we conducted a comprehensive  
424 evaluation for the presence of a broad array of parasitic infections in recent immigrants  
425 in Chicago. We found that 12 percent of recent immigrants in our sample had evidence  
426 of prior or current infection with a pathogenic parasite species.

427 Our study found a few key factors which were significantly more likely in subjects  
428 with evidence of parasites: a self-reported history of having previously observed worms  
429 in the stool, having immigrated within the past 2 years, and reporting a relatively high  
430 number of nonspecific physical ailments within the previous year. Our results also  
431 highlight that clinical risk factors (such as contact with animals and frequently walking  
432 barefoot), symptoms (including urticaria, rash, and diarrhea), and laboratory findings

433 (eosinophilia) traditionally thought to be associated with parasites were commonly found  
434 but not predictive of infection in this study population. If confirmed in a larger sample,  
435 these results suggest that practitioners should have a high degree of suspicion for  
436 parasitic infections when evaluating recent immigrants regardless of the presence or  
437 absence of symptoms or laboratory abnormalities.

438 Our results highlight the limitations of current diagnostic tests for parasitic  
439 infections. For example, the sensitivity of O&P exam compared to qPCR testing (which  
440 is not yet universally available) for pathogenic parasites was very poor. While this could  
441 represent false positive qPCR tests, previous use of these tests in other studies has  
442 indicated a low rate of false positives.[8, 49, 61, 62] Further, the O&P exam has been  
443 shown to have serious limitations, in part because some parasitic infections are  
444 characterized by intermittent shedding in the stool.[70] The lack of adequate diagnostic  
445 tests for parasitic infections was also evident in the fact that, for many of the parasites  
446 screened for in this study, the primary method of diagnosis is serologic testing.  
447 Serologic tests can have significant limitations as they often have cross-reactivity  
448 among multiple parasites and these tests cannot distinguish between prior and current  
449 infections.[3, 6, 8, 17, 28, 37, 71, 72]

450 Similar to prior studies of immigrant populations,[28, 68] we found that a  
451 relatively high percent of subjects in our study had eosinophilia and/or elevated IgE  
452 levels. IgE appeared to be a slightly better marker for chronic parasitic infection in this  
453 sample than eosinophilia. However, neither test had an adequate sensitivity to merit  
454 recommending its use for routine screening purposes. For some parasitic infections,  
455 eosinophilia has been shown to be absent or mild with longstanding infection,[73, 74]

456 and therefore the poor sensitivity of AEC for parasitic infections in our sample could  
457 reflect a lack of acute parasitic infections among these subjects. Although eosinophilia  
458 has long been thought of as a hallmark of helminth infection, several previous studies  
459 have also failed to show any correlation between the two.[75, 76] However, the high  
460 specificity of eosinophilia for parasitosis seen in our study suggests that, when this  
461 finding is present in a recent immigrant, a workup for parasitic infections should be  
462 initiated.

463 A large number of subjects in our study demonstrated cysts of *Blastocystis*  
464 *hominis* on O&P exam. The association between *Blastocystis* and clinical disease has  
465 been controversial. Various studies have shown that subjects with *B. hominis* may have  
466 an increased likelihood of irritable bowel syndrome and that symptomatic patients with  
467 this parasite may experience a beneficial effect from treatment with antiparasitic  
468 medications.[64, 77] In our study, however, infection with *Blastocystis* did not appear to  
469 be associated with any increase in symptoms in the preceding year or on the day of  
470 enrollment. Interestingly, the presence of *Blastocystis* cysts on an O&P exam was  
471 strongly associated with the presence of positive tests for pathogenic parasitic  
472 infections. Therefore, our results agree with those of several recent studies and suggest  
473 that the primary import of *B. hominis* infection may be from a public health perspective  
474 by serving as a surrogate marker for the presence of fecal-oral transmission.[65, 77, 78]

475 Our study results showed that a high percentage of recent immigrants had  
476 evidence of current or prior infection with a few key pathogenic parasites, including  
477 *Strongyloides*, *Toxocara*, and *Giardia*. Positive serologic testing for *Strongyloides* has  
478 been shown to be associated with a high likelihood of active ongoing infection and a risk

479 for developing disseminated disease or hyperinfection syndrome.[17, 79] The rate of  
480 seropositivity for strongyloidiasis in our sample was 4%. This may have clinical  
481 implications because a study evaluating the cost-effectiveness of empiric treatment  
482 versus a test-and-treat strategy found that, if the prevalence of *Strongyloides* infection is  
483 greater than 2% in a community, then the presumptive treatment strategy is more cost-  
484 effective.[80]

485 Our study had several limitations. The small number of subjects found to have  
486 parasitic infections limited our ability to identify risk-factors associated with these  
487 infections. However, our sample size was necessitated by the extensive testing  
488 performed on each subject and was also similar to those of previous studies of  
489 immigrant health.[8, 81] Furthermore, the fact that our sample was very heterogeneous  
490 and subjects enrolled in the study came from many different countries could have  
491 reduced our ability to find associations between clinical factors and the presence of  
492 infection. Our recruitment of some subjects from English as a Second Language  
493 classes and at the Mexican consulate in Chicago could have skewed the study towards  
494 immigrants from non-English-speaking countries and Mexico. A significant limitation to  
495 this study, as for all studies evaluating parasitic infections (as well as to care of patients  
496 at risk for parasitic infection), is the lack of adequate diagnostic tests for parasitosis.

497 Despite these limitations, however, our study is one of the only recent studies to  
498 evaluate the prevalence of parasites in immigrants and provides a strong argument for  
499 further investigation of the health impacts of these infections in the immigrant  
500 community. Although our sample size was limited, a strength of our study is that we  
501 conducted a comprehensive evaluation for parasitic infections including testing of both

502 stool and serum samples. Our results suggest that as many as 12% of recent  
503 immigrants in the community may have evidence of current or previous infection with a  
504 pathogenic parasitic species. From a public health perspective, it is important to note  
505 that the infections identified in the current patient sample are not typically spread from  
506 person to person. However, if confirmed in a larger study, these results present an  
507 important health disparity among a vulnerable underserved population in the US. This  
508 health disparity has persisted despite the presence of effective, safe, and well-tolerated  
509 antiparasitic medications capable of treating each of the identified pathogens in our  
510 sample.[17, 80]

511

512 Acknowledgements – The authors would like to thank E. Scott Elder BS, Isabel  
513 McAuliffe PhD, and Sukwan Handali MD from the Centers for Disease control who  
514 performed the serologic assays conducted on patient samples. JH would like to thank  
515 Ed Mitre, MD, from USUHS and Thomas Nutman MD and Amy Klion MD from the NIH  
516 for input and help with the study design process. We also would like to thank the free  
517 clinics and social services organizations for collaborating with us and providing help with  
518 study recruitment. Dr. Herrick’s research was supported by the National Center for  
519 Advancing Translational Sciences, National Institutes of Health, through Grant  
520 UL1TR000050. Research funding support for RM was provided by the U.S. Department  
521 of Health and Human Services, Health Resources and Services Administration for  
522 Baylor College of Medicine Center of Excellence in Health Equity, Training, and  
523 Research (Grant No: D34HP31024). RM has also received some funding support from  
524 Romark Laboratory. The content is solely the responsibility of the authors and does not

525 necessarily represent the official views of the NIH. The funders had no role in the study  
526 design, data collection and analysis, decision to publish, or preparation of the  
527 manuscript.

528

529

530

532 REFERENCES

- 533 1. Garg PK, Perry S, Dorn M, Hardcastle L, Parsonnet J. Risk of intestinal helminth and  
534 protozoan infection in a refugee population. *The American journal of tropical medicine and*  
535 *hygiene*. 2005;73(2):386-91.
- 536 2. Hotez PJ. Neglected diseases and poverty in "The Other America": the greatest health  
537 disparity in the United States? *PLoS neglected tropical diseases*. 2007;1(3):e149.
- 538 3. Hotez PJ. Neglected infections of poverty in the United States of America. *PLoS*  
539 *neglected tropical diseases*. 2008;2(6):e256.
- 540 4. Hotez PJ. Neglected parasitic infections and poverty in the United States. *PLoS neglected*  
541 *tropical diseases*. 2014;8(9):e3012.
- 542 5. Hotez PJ, Bottazzi ME, Dumonteil E, Valenzuela JG, Kamhawi S, Ortega J, et al. Texas and  
543 Mexico: sharing a legacy of poverty and neglected tropical diseases. *PLoS neglected tropical*  
544 *diseases*. 2012;6(3):e1497.
- 545 6. Jariwala S, Redding L, Hewitt D. The severely under-recognized public health risk of  
546 strongyloidiasis in North American cities-A One Health approach. *Zoonoses Public Health*. 2017.
- 547 7. Parise ME, Hotez PJ, Slutsker L. Neglected parasitic infections in the United States: needs  
548 and opportunities. *The American journal of tropical medicine and hygiene*. 2014;90(5):783-5.
- 549 8. Hochberg NS, Moro RN, Sheth AN, Montgomery SP, Steurer F, McAuliffe IT, et al. High  
550 prevalence of persistent parasitic infections in foreign-born, HIV-infected persons in the United  
551 States. *PLoS neglected tropical diseases*. 2011;5(4):e1034.
- 552 9. Bern C, Kjos S, Yabsley MJ, Montgomery SP. *Trypanosoma cruzi* and Chagas' Disease in  
553 the United States. *Clinical microbiology reviews*. 2011;24(4):655-81.
- 554 10. Schmunis GA, Yadon ZE. Chagas disease: a Latin American health problem becoming a  
555 world health problem. *Acta tropica*. 2010;115(1-2):14-21.
- 556 11. Bern C, Montgomery SP. An estimate of the burden of Chagas disease in the United  
557 States. *Clinical infectious diseases : an official publication of the Infectious Diseases Society of*  
558 *America*. 2009;49(5):e52-4.
- 559 12. Leiby DA, Herron RM, Jr., Read EJ, Lenos BA, Stumpf RJ. *Trypanosoma cruzi* in Los  
560 Angeles and Miami blood donors: impact of evolving donor demographics on seroprevalence  
561 and implications for transfusion transmission. *Transfusion*. 2002;42(5):549-55.
- 562 13. Sarkar S, Strutz SE, Frank DM, Rivaldi CL, Sissel B, Sanchez-Cordero V. Chagas disease risk  
563 in Texas. *PLoS neglected tropical diseases*. 2010;4(10).
- 564 14. Zaniello BA, Kessler DA, Vine KM, Grima KM, Weisenberg SA. Seroprevalence of Chagas  
565 infection in the donor population. *PLoS neglected tropical diseases*. 2012;6(7):e1771.
- 566 15. Manne-Goehler J, Umeh CA, Montgomery SP, Wirtz VJ. Estimating the Burden of Chagas  
567 Disease in the United States. *PLoS neglected tropical diseases*. 2016;10(11):e0005033.
- 568 16. Liu EW, Chastain HM, Shin SH, Wiegand RE, Kruszon-Moran D, Handali S, et al.  
569 Seroprevalence of Antibodies to *Toxocara* Species in the United States and Associated Risk  
570 Factors, 2011-2014. *Clinical infectious diseases : an official publication of the Infectious*  
571 *Diseases Society of America*. 2018;66(2):206-12.
- 572 17. Posey DL, Blackburn BG, Weinberg M, Flagg EW, Ortega L, Wilson M, et al. High  
573 prevalence and presumptive treatment of schistosomiasis and strongyloidiasis among African  
574 refugees. *Clinical infectious diseases : an official publication of the Infectious Diseases Society of*  
575 *America*. 2007;45(10):1310-5.



- 576 18. Safdar A, Malathum K, Rodriguez SJ, Husni R, Rolston KV. Strongyloidiasis in patients at a  
577 comprehensive cancer center in the United States. *Cancer*. 2004;100(7):1531-6.
- 578 19. Adams DA, Thomas KR, Jajosky RA, Foster L, Baroi G, Sharp P, et al. Summary of  
579 Notifiable Infectious Diseases and Conditions - United States, 2015. *MMWR Morb Mortal Wkly*  
580 *Rep*. 2017;64(53):1-143.
- 581 20. Starr MC, Montgomery SP. Soil-transmitted Helminthiasis in the United States: a  
582 systematic review--1940-2010. *The American journal of tropical medicine and hygiene*.  
583 2011;85(4):680-4.
- 584 21. Escobedo LG, Homedes N, von Alt K, Escobedo MA. Intestinal parasites in children from  
585 three west Texas border communities. *J Sch Health*. 2004;74(10):411-3.
- 586 22. McKenna ML, McAtee S, Bryan PE, Jeun R, Ward T, Kraus J, et al. Human Intestinal  
587 Parasite Burden and Poor Sanitation in Rural Alabama. *The American journal of tropical*  
588 *medicine and hygiene*. 2017;97(5):1623-8.
- 589 23. Sanders JW, Goraleski KA. The Hookworm Blues: We Still Got 'em. *The American journal*  
590 *of tropical medicine and hygiene*. 2017;97(5):1277-9.
- 591 24. Arena R, Mathews CE, Kim AY, Lenz TE, Southern PM. Prevalence of antibody to  
592 *Trypanosoma cruzi* in Hispanic-surnamed patients seen at Parkland Health & Hospital System,  
593 Dallas, Texas. *BMC Res Notes*. 2011;4:132.
- 594 25. Ostera G, Blum J. Strongyloidiasis: Risk and Healthcare Access for Latin American  
595 Immigrants Living in the United States. *Curr Trop Med Rep*. 2016;3:1-3.
- 596 26. Ostera G, Blum J, Cornejo C, Burgula S, Jeun R, Bryan PE, et al. Strongyloidiasis in Latin  
597 American immigrants: a pilot study. *J Helminthol*. 2017;91(2):262-6.
- 598 27. Meymandi SK, Hernandez S, Forsyth CJ. A Community-Based Screening Program for  
599 Chagas Disease in the USA. *Trends in parasitology*. 2017;33(11):828-31.
- 600 28. Belhassen-Garcia M, Pardo-Lledias J, Perez del Villar L, Muro A, Velasco-Tirado V,  
601 Blazquez de Castro A, et al. Relevance of eosinophilia and hyper-IgE in immigrant children.  
602 *Medicine (Baltimore)*. 2014;93(6):e43.
- 603 29. Shulman IA, Appleman MD, Saxena S, Hiti AL, Kirchhoff LV. Specific antibodies to  
604 *Trypanosoma cruzi* among blood donors in Los Angeles, California. *Transfusion*. 1997;37(7):727-  
605 31.
- 606 30. Khurana S, Sethi S. Laboratory diagnosis of soil transmitted helminthiasis. *Trop Parasitol*.  
607 2017;7(2):86-91.
- 608 31. Maddison SE. Serodiagnosis of parasitic diseases. *Clinical microbiology reviews*.  
609 1991;4(4):457-69.
- 610 32. Ndao M. Diagnosis of parasitic diseases: old and new approaches. *Interdiscip Perspect*  
611 *Infect Dis*. 2009;2009:278246.
- 612 33. Bern C, Montgomery SP, Katz L, Caglioti S, Stramer SL. Chagas disease and the US blood  
613 supply. *Curr Opin Infect Dis*. 2008;21(5):476-82.
- 614 34. Conners EE, Vinetz JM, Weeks JR, Brouwer KC. A global systematic review of Chagas  
615 disease prevalence among migrants. *Acta tropica*. 2016;156:68-78.
- 616 35. Perez-Molina JA, Norman F, Lopez-Velez R. Chagas disease in non-endemic countries:  
617 epidemiology, clinical presentation and treatment. *Curr Infect Dis Rep*. 2012;14(3):263-74.
- 618 36. Crum NF, Chun HM, Favata MA, Hale BR. Gastrointestinal Schistosomiasis japonicum  
619 infections in immigrants from the Island of Leyte, Philippines. *J Travel Med*. 2003;10(2):131-2.

- 620 37. Rapoport AB, McCormick D, Cohen PA. Screening for *Schistosoma mansoni* and  
621 *Strongyloides stercoralis* Infection Among Brazilian Immigrants in the United States. *Open*  
622 *Forum Infect Dis.* 2015;2(1):ofv003.
- 623 38. Won KY, Kruszon-Moran D, Schantz PM, Jones JL. National seroprevalence and risk  
624 factors for Zoonotic *Toxocara* spp. infection. *The American journal of tropical medicine and*  
625 *hygiene.* 2008;79(4):552-7.
- 626 39. Fitzpatrick MA, Caicedo JC, Stosor V, Ison MG. Expanded infectious diseases screening  
627 program for Hispanic transplant candidates. *Transpl Infect Dis.* 2010;12(4):336-41.
- 628 40. Moncayo A, Ortiz Yanine MI. An update on Chagas disease (human American  
629 trypanosomiasis). *Annals of tropical medicine and parasitology.* 2006;100(8):663-77.
- 630 41. Buijs J, Borsboom G, Renting M, Hilgersom WJ, van Wieringen JC, Jansen G, et al.  
631 Relationship between allergic manifestations and *Toxocara* seropositivity: a cross-sectional  
632 study among elementary school children. *The European respiratory journal : official journal of*  
633 *the European Society for Clinical Respiratory Physiology.* 1997;10(7):1467-75.
- 634 42. Cobzaru RG, Ripa C, Leon MM, Luca MC, Ivan A, Luca M. Correlation between asthma  
635 and *Toxocara canis* infection. *Rev Med Chir Soc Med Nat Iasi.* 2012;116(3):727-30.
- 636 43. Kanobana K, Vereecken K, Junco Diaz R, Sariego I, Rojas L, Bonet Gorbea M, et al.  
637 *Toxocara* seropositivity, atopy and asthma: a study in Cuban schoolchildren. *Tropical medicine*  
638 *& international health : TM & IH.* 2013.
- 639 44. Walsh MG. *Toxocara* infection and diminished lung function in a nationally  
640 representative sample from the United States population. *International journal for*  
641 *parasitology.* 2011;41(2):243-7.
- 642 45. Yap P, Furst T, Muller I, Kriemler S, Utzinger J, Steinmann P. Determining soil-  
643 transmitted helminth infection status and physical fitness of school-aged children. *Journal of*  
644 *visualized experiments : JoVE.* 2012(66):e3966.
- 645 46. Ezeamama AE, Friedman JF, Acosta LP, Bellinger DC, Langdon GC, Manalo DL, et al.  
646 Helminth infection and cognitive impairment among Filipino children. *The American journal of*  
647 *tropical medicine and hygiene.* 2005;72(5):540-8.
- 648 47. Hotez PJ, Murray KO, Buekens P. The Gulf Coast: a new American underbelly of tropical  
649 diseases and poverty. *PLoS neglected tropical diseases.* 2014;8(5):e2760.
- 650 48. [Available from:  
651 [https://factfinder.census.gov/faces/tableservices/jsf/pages/productview.xhtml?pid=ACS\\_16\\_1YR](https://factfinder.census.gov/faces/tableservices/jsf/pages/productview.xhtml?pid=ACS_16_1YR_S0501&prodType=table)  
652 [\\_S0501&prodType=table.](https://factfinder.census.gov/faces/tableservices/jsf/pages/productview.xhtml?pid=ACS_16_1YR_S0501&prodType=table)
- 653 49. Winsberg GR, Sonnenschein E, Dyer AR, Schnadig V, Bonilla E. Prevalence of intestinal  
654 parasites in Latino residents of Chicago. *American journal of epidemiology.* 1975;102(6):526-32.
- 655 50. Jourdan PM, Lambertson PHL, Fenwick A, Addiss DG. Soil-transmitted helminth  
656 infections. *Lancet.* 2017.
- 657 51. Anderson JP, Rascoe LN, Levert K, Chastain HM, Reed MS, Rivera HN, et al. Development  
658 of a Luminex Bead Based Assay for Diagnosis of Toxocariasis Using Recombinant Antigens Tc-  
659 CTL-1 and Tc-TES-26. *PLoS neglected tropical diseases.* 2015;9(10):e0004168.
- 660 52. Hernandez-Gonzalez A, Noh J, Perteguer MJ, Garate T, Handali S. Comparison of T24H-  
661 his, GST-T24H and GST-Ts8B2 recombinant antigens in western blot, ELISA and multiplex bead-  
662 based assay for diagnosis of neurocysticercosis. *Parasites & vectors.* 2017;10(1):237.

- 663 53. Rascoe LN, Price C, Shin SH, McAuliffe I, Priest JW, Handali S. Development of Ss-NIE-1  
664 recombinant antigen based assays for immunodiagnosis of strongyloidiasis. PLoS neglected  
665 tropical diseases. 2015;9(4):e0003694.
- 666 54. Affranchino JL, Ibanez CF, Luquetti AO, Rassi A, Reyes MB, Macina RA, et al.  
667 Identification of a Trypanosoma cruzi antigen that is shed during the acute phase of Chagas'  
668 disease. Mol Biochem Parasitol. 1989;34(3):221-8.
- 669 55. Chagatest: ELISA recombinante v. 3.0. Rosario A.
- 670 56. da Silveira JF, Umezawa ES, Luquetti AO. Chagas disease: recombinant Trypanosoma  
671 cruzi antigens for serological diagnosis. Trends in parasitology. 2001;17(6):286-91.
- 672 57. Hancock K, Tsang VC. Development and optimization of the FAST-ELISA for detecting  
673 antibodies to Schistosoma mansoni. J Immunol Methods. 1986;92(2):167-76.
- 674 58. Tsang VC, Wilkins PP. Immunodiagnosis of schistosomiasis. Screen with FAST-ELISA and  
675 confirm with immunoblot. Clin Lab Med. 1991;11(4):1029-39.
- 676 59. Tsang VC, Wilkins PP. Immunodiagnosis of schistosomiasis. Immunol Invest. 1997;26(1-  
677 2):175-88.
- 678 60. Bass JL, Mehta KA, Eppes B. Parasitology screening of Latin American children in a  
679 primary care clinic. Pediatrics. 1992;89(2):279-83.
- 680 61. Cimino RO, Jeun R, Juarez M, Cajal PS, Vargas P, Echazu A, et al. Identification of human  
681 intestinal parasites affecting an asymptomatic peri-urban Argentinian population using multi-  
682 parallel quantitative real-time polymerase chain reaction. Parasites & vectors. 2015;8:380.
- 683 62. Mejia R, Vicuna Y, Broncano N, Sandoval C, Vaca M, Chico M, et al. A novel, multi-  
684 parallel, real-time polymerase chain reaction approach for eight gastrointestinal parasites  
685 provides improved diagnostic capabilities to resource-limited at-risk populations. The American  
686 journal of tropical medicine and hygiene. 2013;88(6):1041-7.
- 687 63. Weatherhead J, Cortes AA, Sandoval C, Vaca M, Chico M, Loor S, et al. Comparison of  
688 Cytokine Responses in Ecuadorian Children Infected with Giardia, Ascaris, or Both Parasites. The  
689 American journal of tropical medicine and hygiene. 2017;96(6):1394-9.
- 690 64. Andersen LO, Stensvold CR. Blastocystis in Health and Disease: Are We Moving from a  
691 Clinical to a Public Health Perspective? Journal of clinical microbiology. 2016;54(3):524-8.
- 692 65. Roberts T, Stark D, Harkness J, Ellis J. Update on the pathogenic potential and treatment  
693 options for Blastocystis sp. Gut Pathog. 2014;6:17.
- 694 66. Fernando SL. Drug-reaction eosinophilia and systemic symptoms and drug-induced  
695 hypersensitivity syndrome. Australas J Dermatol. 2014;55(1):15-23.
- 696 67. Nutman TB. Evaluation and differential diagnosis of marked, persistent eosinophilia.  
697 Immunol Allergy Clin North Am. 2007;27(3):529-49.
- 698 68. Schulte C, Krebs B, Jelinek T, Nothdurft HD, von Sonnenburg F, Loscher T. Diagnostic  
699 significance of blood eosinophilia in returning travelers. Clinical infectious diseases : an official  
700 publication of the Infectious Diseases Society of America. 2002;34(3):407-11.
- 701 69. Seybolt LM, Christiansen D, Barnett ED. Diagnostic evaluation of newly arrived  
702 asymptomatic refugees with eosinophilia. Clinical infectious diseases : an official publication of  
703 the Infectious Diseases Society of America. 2006;42(3):363-7.
- 704 70. Dreyer G, Fernandes-Silva E, Alves S, Rocha A, Albuquerque R, Addiss D. Patterns of  
705 detection of Strongyloides stercoralis in stool specimens: implications for diagnosis and clinical  
706 trials. Journal of clinical microbiology. 1996;34(10):2569-71.

- 707 71. Hotez PJ, Wilkins PP. Toxocariasis: America's most common neglected infection of  
708 poverty and a helminthiasis of global importance? PLoS neglected tropical diseases.  
709 2009;3(3):e400.
- 710 72. Salvador F, Sulleiro E, Sanchez-Montalva A, Saugar JM, Rodriguez E, Pahissa A, et al.  
711 Usefulness of Strongyloides stercoralis serology in the management of patients with  
712 eosinophilia. The American journal of tropical medicine and hygiene. 2014;90(5):830-4.
- 713 73. Gill GV, Welch E, Bailey JW, Bell DR, Beeching NJ. Chronic Strongyloides stercoralis  
714 infection in former British Far East prisoners of war. QJM. 2004;97(12):789-95.
- 715 74. O'Connell EM, Nutman TB. Eosinophilia in Infectious Diseases. Immunol Allergy Clin  
716 North Am. 2015;35(3):493-522.
- 717 75. Asgary R, Naderi R, Swedish KA, Smith CL, Sckell B, Doorley S. Communicable and non-  
718 communicable diseases among recent immigrants with implications for primary care; a  
719 comprehensive immigrant health approach. J Immigr Minor Health. 2011;13(6):990-5.
- 720 76. Dawson-Hahn EE, Greenberg SL, Domachowske JB, Olson BG. Eosinophilia and the  
721 seroprevalence of schistosomiasis and strongyloidiasis in newly arrived pediatric refugees: an  
722 examination of Centers for Disease Control and Prevention screening guidelines. J Pediatr.  
723 2010;156(6):1016-8, 8 e1.
- 724 77. Coyle CM, Varughese J, Weiss LM, Tanowitz HB. Blastocystis: to treat or not to treat.  
725 Clinical infectious diseases : an official publication of the Infectious Diseases Society of America.  
726 2012;54(1):105-10.
- 727 78. Turkeltaub JA, McCarty TR, 3rd, Hotez PJ. The intestinal protozoa: emerging impact on  
728 global health and development. Curr Opin Gastroenterol. 2015;31(1):38-44.
- 729 79. Vadlamudi RS, Chi DS, Krishnaswamy G. Intestinal strongyloidiasis and hyperinfection  
730 syndrome. Clin Mol Allergy. 2006;4:8.
- 731 80. Muennig P, Pallin D, Challah C, Khan K. The cost-effectiveness of ivermectin vs.  
732 albendazole in the presumptive treatment of strongyloidiasis in immigrants to the United  
733 States. Epidemiology and infection. 2004;132(6):1055-63.
- 734 81. Loutfy MR, Wilson M, Keystone JS, Kain KC. Serology and eosinophil count in the  
735 diagnosis and management of strongyloidiasis in a non-endemic area. The American journal of  
736 tropical medicine and hygiene. 2002;66(6):749-52.

737

738

739 **Supporting Information:**

740 **S1 Supplemental Appendix. Closed-answer questionnaire.** This questionnaire was  
741 filled out by each participant to obtain information about their demographics, symptoms,  
742 and exposure histories.

743 **S2 Supplemental Table 1. Serologic testing performed based on subjects'**  
744 **countries of origin.**

745 **S3 Supplemental Figure 1. Study recruitment and enrollment.**

746 **S4 Supplemental Table 2. Responses to closed-answer questionnaire and**  
747 **laboratory results.** This table contains the complete individual responses subjects  
748 provided to the symptom and demographic questionnaire as well as the raw results from  
749 all laboratory tests performed.

750

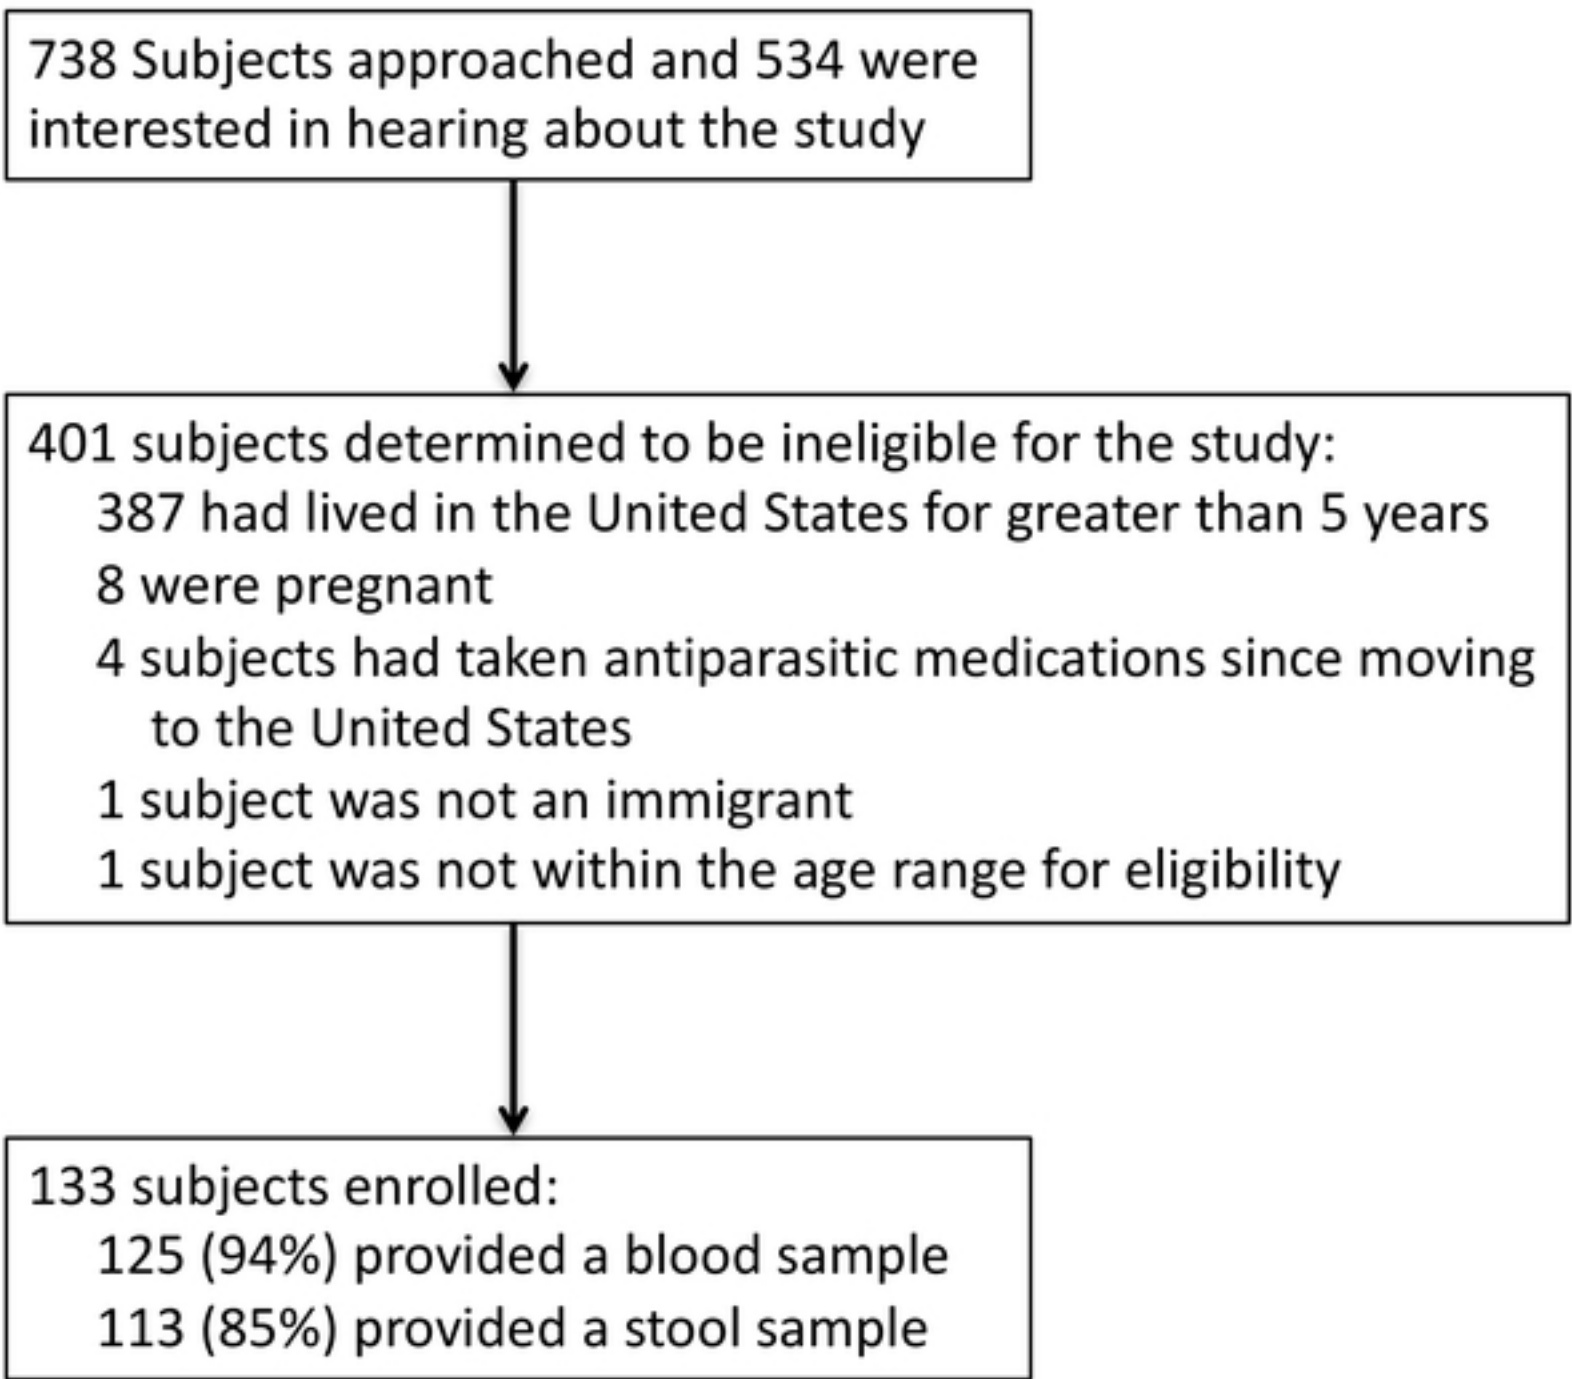

Figure
